# Supplementary material for: Novel carbazole-based donor-isoindolo[2,1-a]benzimidazol-11-one acceptor polymers for ternary flash memory and light-emission
Source: Royal Society of Chemistry journal article supplement (doi:10.1039/c9ra05859a), 2019-01-01

## Supporting Information

### Novel carbazole-based donor-isoindolo[2,1-a]benzimidazol-11-one acceptor polymers for ternary flash memory and light-emitting

Qian Zhang<sup>1</sup>, Chunpeng Ai<sup>2</sup>, Dianzhong Wen<sup>2</sup>, Dongge Ma<sup>3</sup>, Cheng Wang<sup>1</sup>, Shuhong Wang<sup>1,\*</sup>, Xuduo Bai<sup>1,\*</sup>

1 Key Laboratory of Functional Inorganic Material Chemistry, Ministry of Education, School of Chemistry Engineering and Materials Science, Heilongjiang University, Harbin, 150080, China

2 Key Laboratories of Senior-education for Electronic Engineering, Heilongjiang University, Harbin, 150080, China

3 Institute of Polymer Materials, South China University of Technology, Guangzhou, 510640, China

### List of Contents

|                                                                                                                                  |    |
|----------------------------------------------------------------------------------------------------------------------------------|----|
| 1. Synthesis of monomer 0f, 2f and 4f.....                                                                                       | 2  |
| 2. FT-IR and <sup>1</sup> H-NMR of monomer 0f, 2f and 4f.....                                                                    | 3  |
| 3. FT-IR of polymer PCz0, PCz2 and PCz4.....                                                                                     | 6  |
| 4. <sup>1</sup> H-NMR of polymer PCz0, PCz2 and PCz4.....                                                                        | 7  |
| 5. Thermal gravimetric analyses of polymer PCz0, PCz2 and PCz4.....                                                              | 9  |
| 6. The ON/OFF current ratio of three memory devices.....                                                                         | 10 |
| 7. Illustration of molecular orbitals and the corresponding energy levels based on optimized repeated unit of PCz2 and PCz4..... | 11 |

## 1. Synthesis of monomer **0f**, **2f** and **4f**

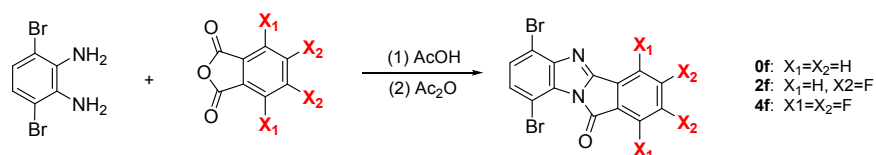

A mixture of 3,6-dibromo-1,2-phenylenediamine (1.33 g, 5 mmol) and phthalic anhydride (0.74 g, 5 mmol) were stirred in glacial acetic acid under nitrogen at 120 °C for 3 hours. The precipitation was washed with water and methanol, dried under vacuum and refluxed in 2 mL of acetic anhydride under nitrogen for 6 h. The crude production was purified by column chromatography (silica gel, dichloromethane / petroleum ether = 2:1, v: v). The yellow monomer **0f** was obtained with yield of 1.36 g (72%).

A mixture of 3,6-dibromo-1,2-phenylenediamine (1.33 g, 5 mmol) and 4,5-difluorophthalic anhydride (0.92 g, 5 mmol) were stirred in glacial acetic acid under nitrogen at 120 °C for 2 hours. The precipitation was washed with water and methanol, dried under vacuum and refluxed in 2 mL of acetic anhydride under nitrogen for 6 h. The crude production was purified by column chromatography (silica gel, dichloromethane / petroleum ether = 2:1, v: v) and afforded 1.58 g (76%) of yellow solid monomer **2f**.

A mixture of 3,6-dibromo-1,2-phenylenediamine (1.33 g, 5 mmol) and 4,5-difluorophthalic anhydride (0.92 g, 5 mmol) were stirred in glacial acetic acid under nitrogen at 120 °C for 2 hours. The precipitation was washed with water and methanol, dried under vacuum and refluxed in 2 mL of acetic anhydride under nitrogen for 6 h. The crude production was purified by column chromatography (silica gel, dichloromethane / petroleum ether = 2:1, v: v) and afforded 1.47 g (65%) of yellow solid monomer **4f**.

## 2. FT-IR and <sup>1</sup>H-NMR of monomer 0f, 2f and 4f

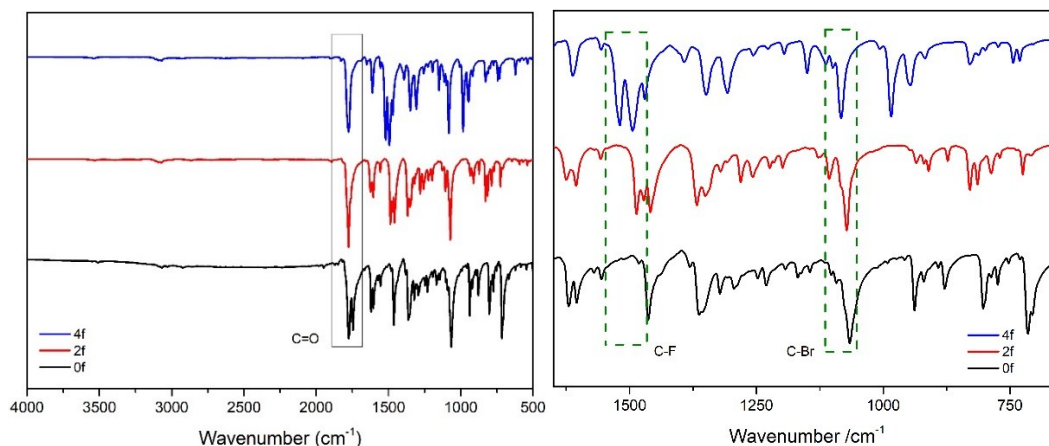

In the case of IR spectrum, monomers exhibited similar characteristic bands around 1770  $\text{cm}^{-1}$  (C=O stretching), 1600  $\text{cm}^{-1}$  (C=C and C=N stretching). Note that the stretching vibrations of carbonyl groups in condensed cyclic  $\gamma$ -lactams would move to above 1760  $\text{cm}^{-1}$  in their IR spectra. <sup>[1]</sup> The C-X bonds don't usually possess a constant vibrational frequency nor do they always have unique absorption band features, which may lead to the difficulty of locating and recognizing their absorption. <sup>[2]</sup> Since the C-F stretching could exhibit two or more bands of polyfluorinated aliphatic hydrocarbons with a broad range of 1400-1000  $\text{cm}^{-1}$ , <sup>[2]</sup> and compared with the non-fluorinated monomer 0f and with three polymers which possess no C-Br bond, the aromatic C-Br and C-F stretching bands of three monomers were assumed to be as follows:

0f: 1066  $\text{cm}^{-1}$  (C-Br)

2f: 1072  $\text{cm}^{-1}$  (C-Br); 1472  $\text{cm}^{-1}$  and 1486  $\text{cm}^{-1}$  (C-F)

4f: 1083  $\text{cm}^{-1}$  (C-Br); 1494  $\text{cm}^{-1}$  and 1519  $\text{cm}^{-1}$  (C-F)

---

<sup>1</sup> E. V. Gromachevskaya, A. V. Finko, A. V. Butin, K. S. Pushkareva, V. D. Strelkov, L. I. Isakova, G. D. Krapivin, *Chem. Heterocycl. Compd.* **2013**, *49*, 1331-1344.

<sup>2</sup> The Sadtler Handbook of Infrared Spectra, in: Sadtler Spectral Handbooks, Bio-Rad Laboratories, Inc., Informatics Division.

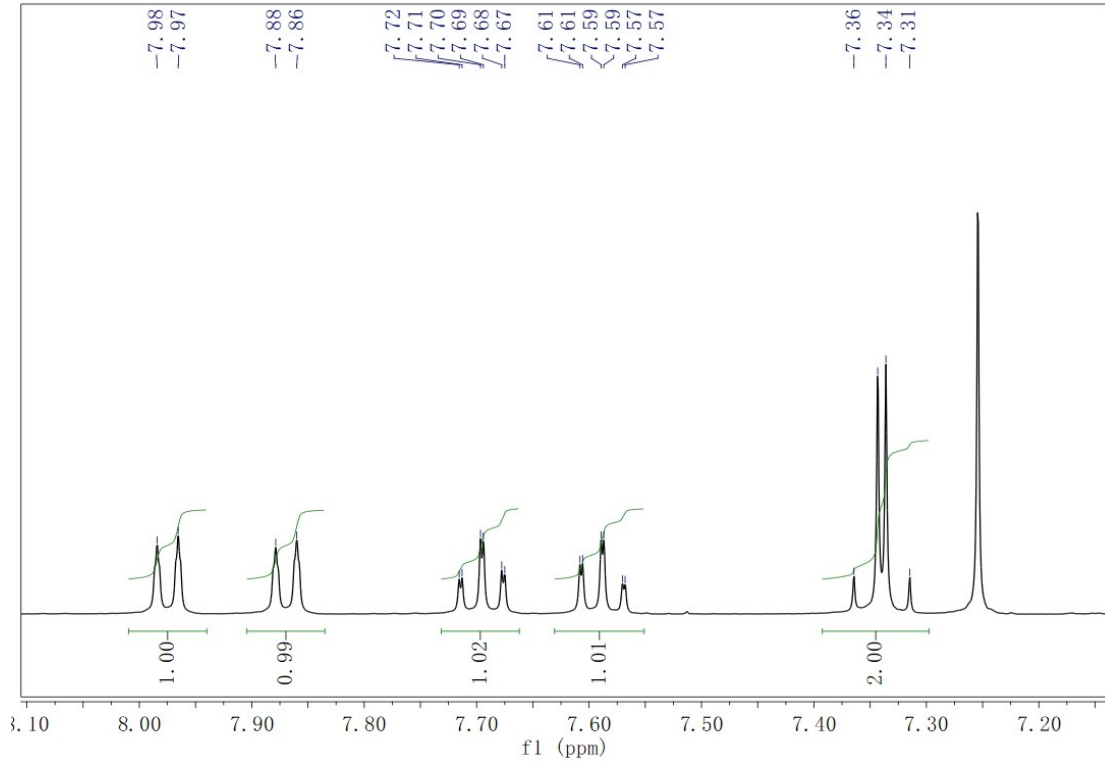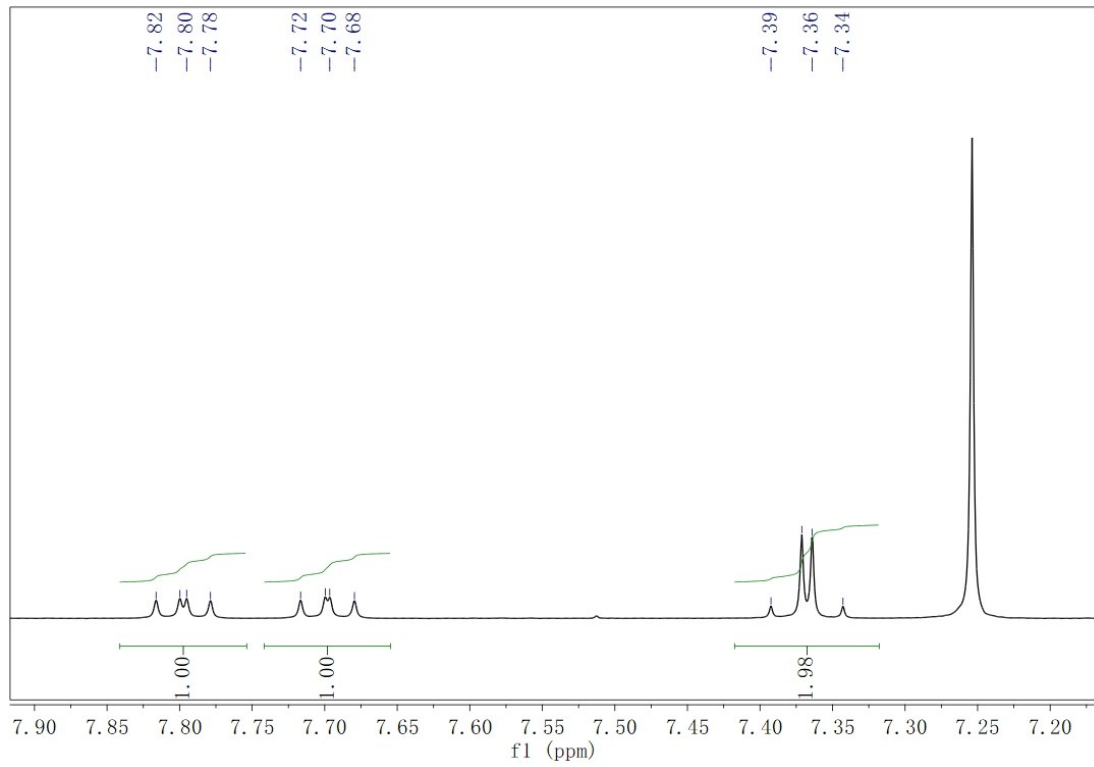

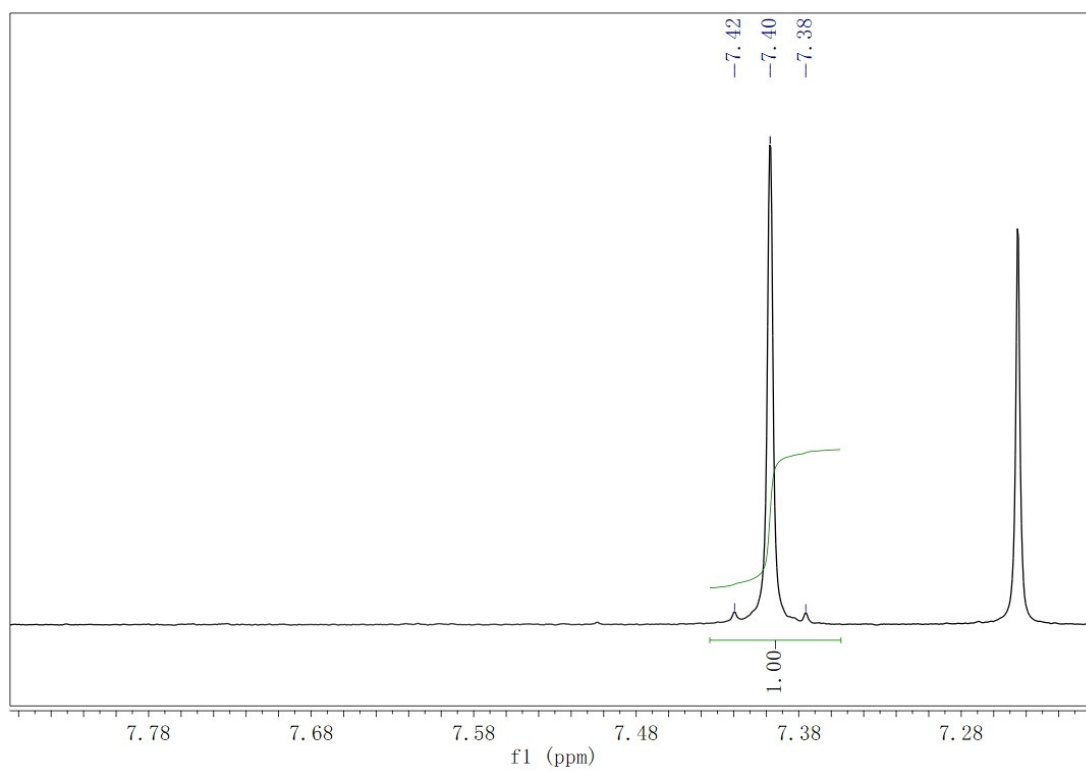

<sup>1</sup>H-NMR (400 MHz, CDCl<sub>3</sub>), δ (ppm):

0f: 7.97 (d, 1 H), 7.87 (d, 1 H), 7.70 (td, 1 H), 7.59 (td, 1 H), 7.39–7.30 (m, 2 H).

2f: 7.80 (dd, 1 H), 7.70 (dd, 1 H), 7.42–7.39 (m, 2 H).

4f: 7.40 (m, 1 H)

### 3. FT-IR of polymer PCz0, PCz2 and PCz4

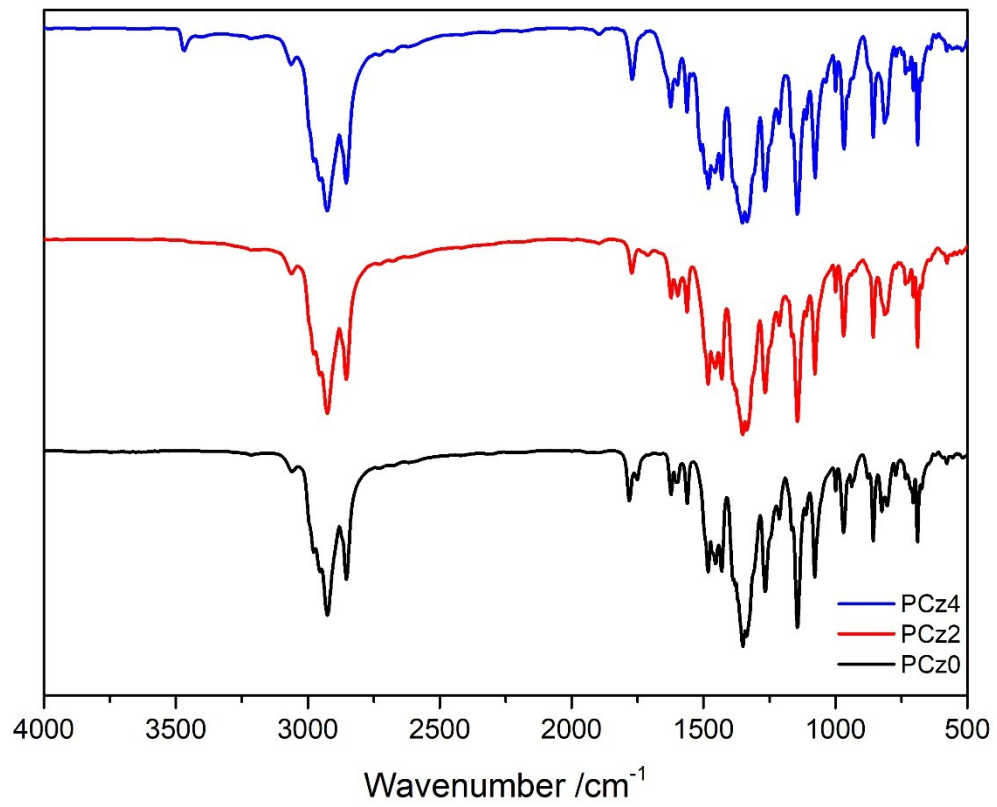

#### 4. $^1\text{H}$ -NMR of polymer PCz0, PCz2 and PCz4

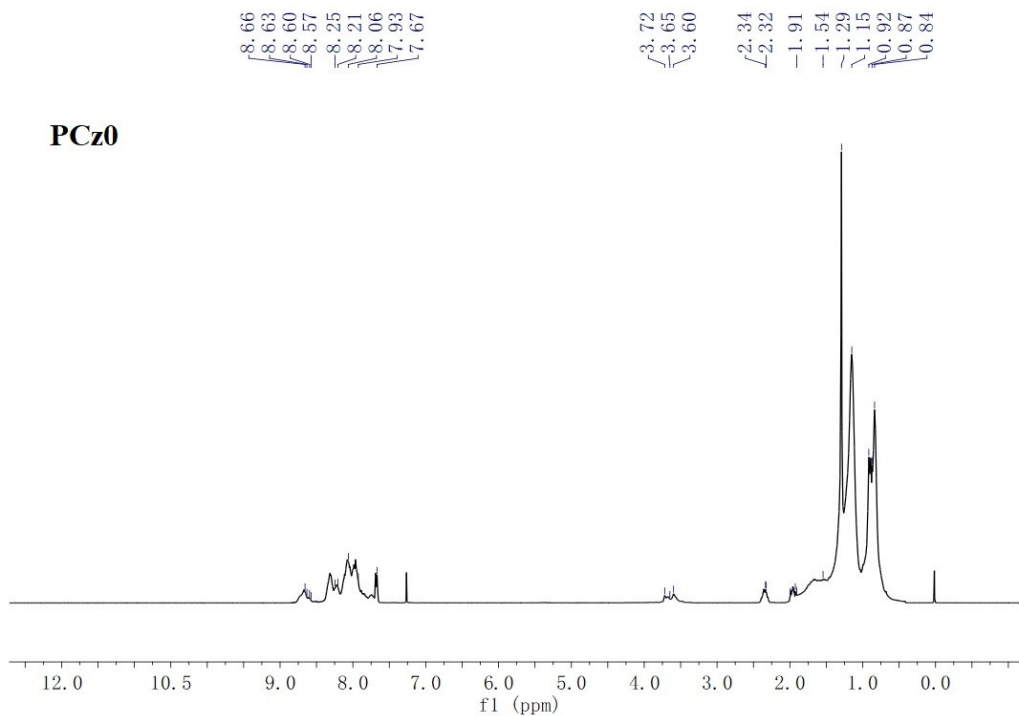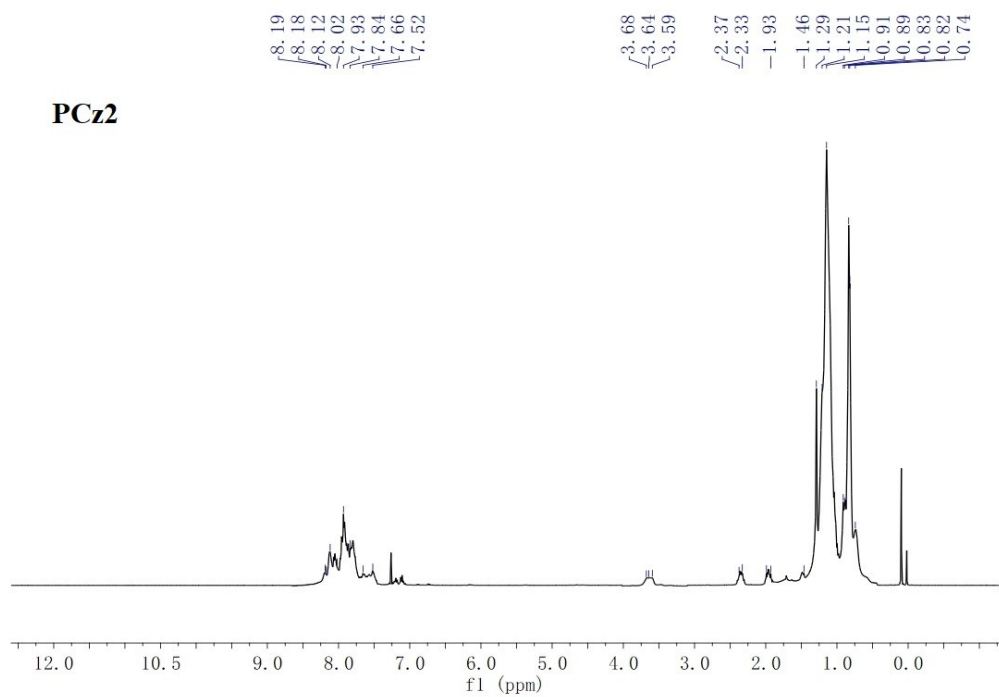

**PCz4**

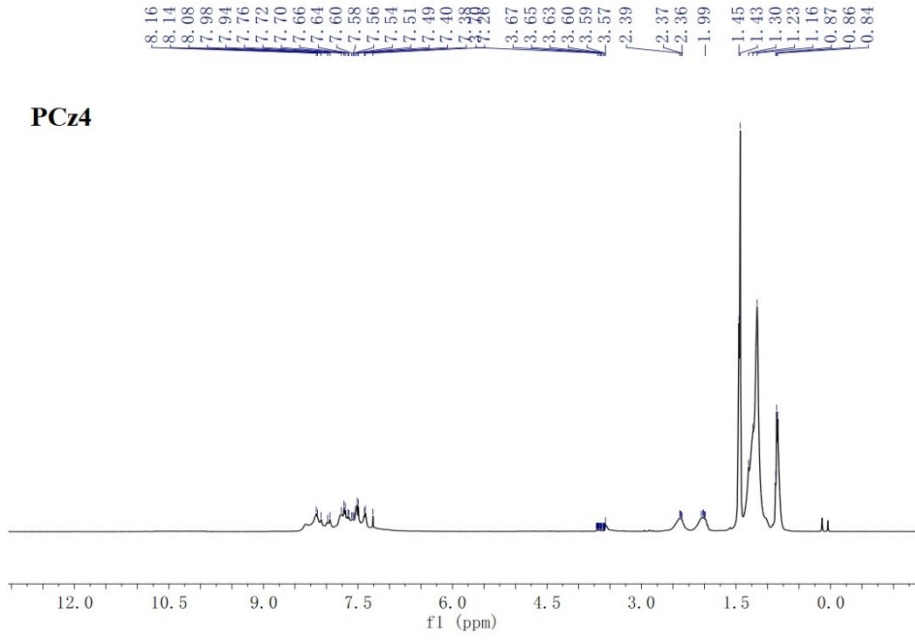



## 5. Thermal gravimetric analyses of polymer PCz0, PCz2 and PCz4

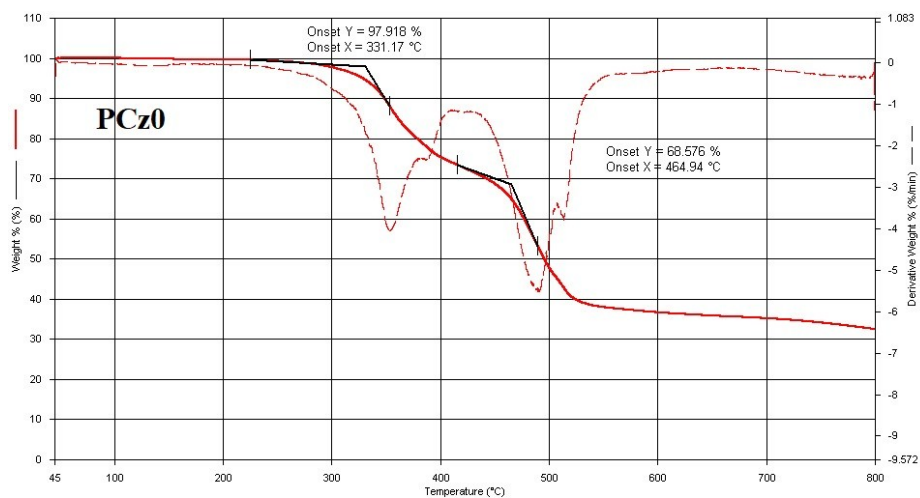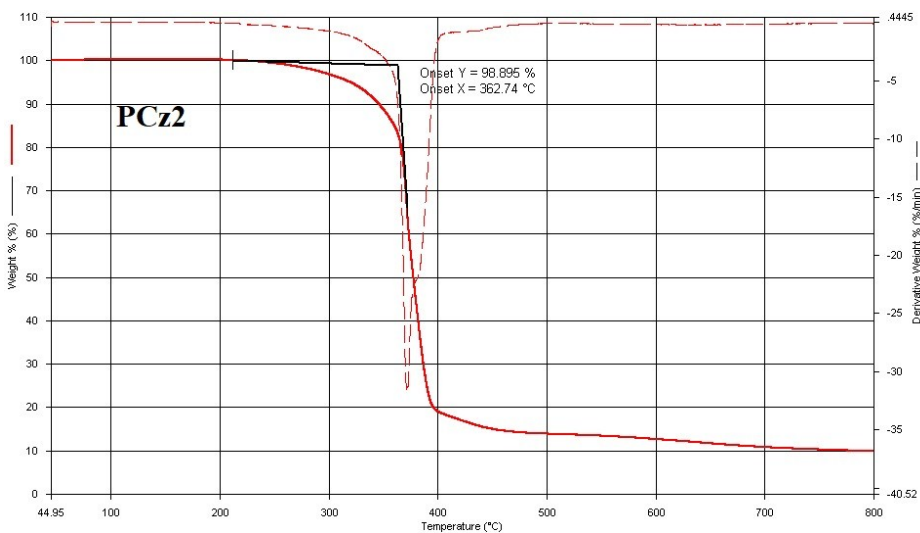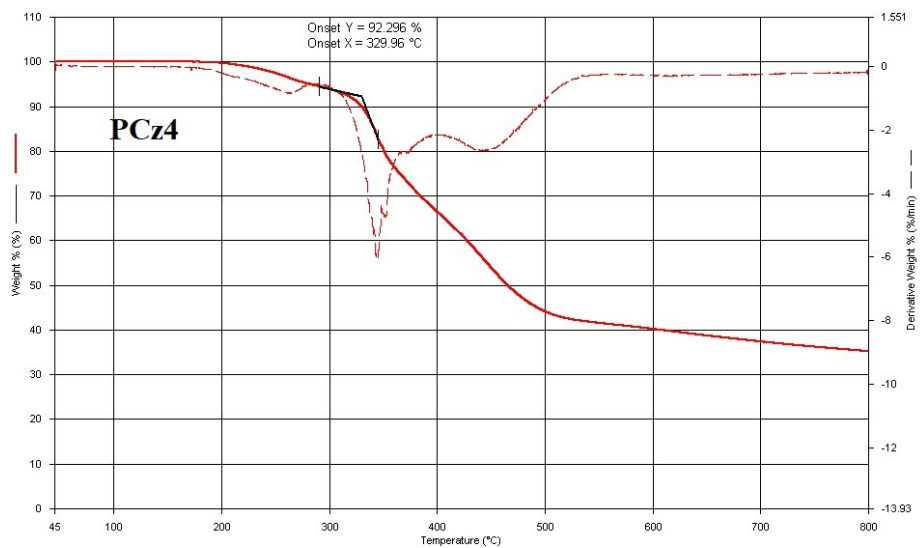

## 6. The ON/OFF current ratio of three memory devices

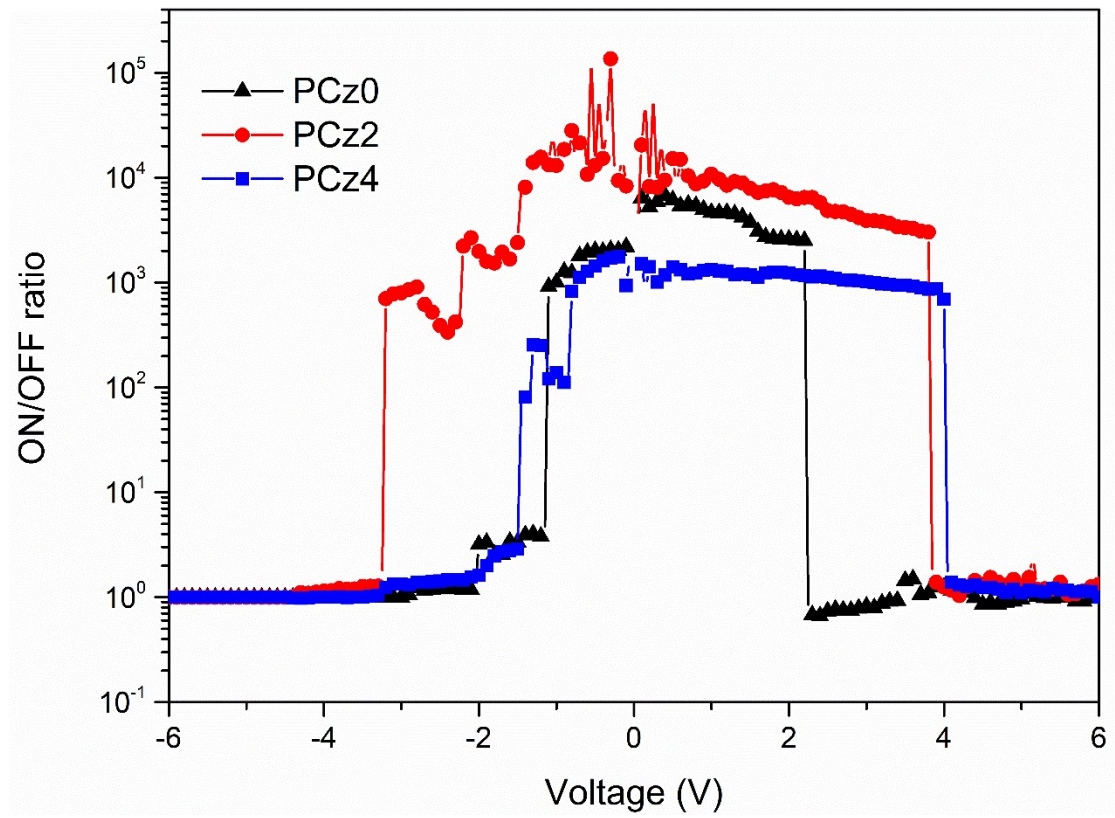

**7. Illustration of molecular orbitals and the corresponding energy levels based on optimized repeated unit of PCz2 and PCz4.**

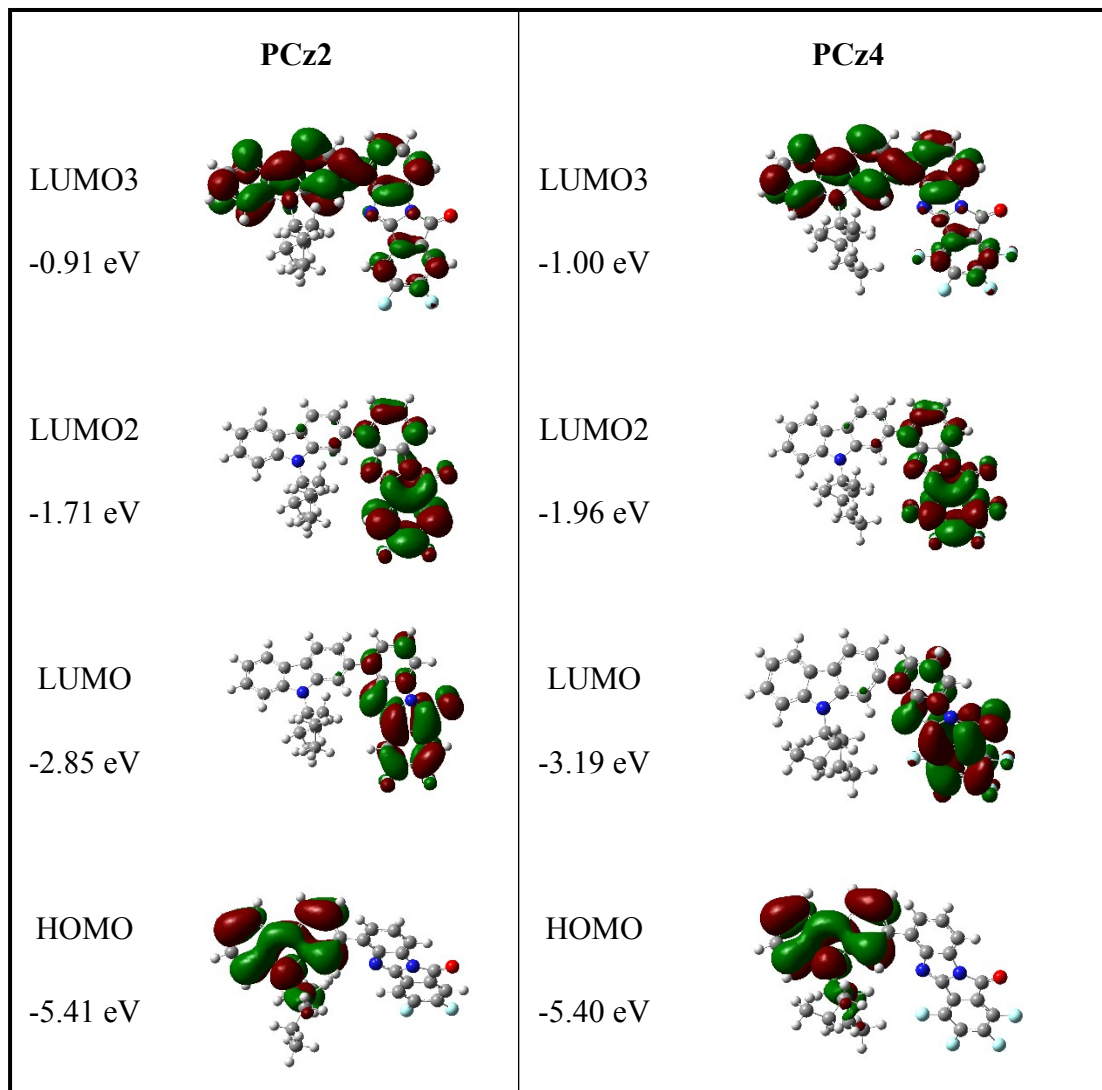

Supplement: c9ra05859a1.pdf [file c9ra05859a1.pdf]
